# Supplementary material
Source: Springer Nature journal article supplement (https://www.springermedizin.de/resource/supplementary/12889_2011_4096_MOESM1_ESM.pdf/9491842)

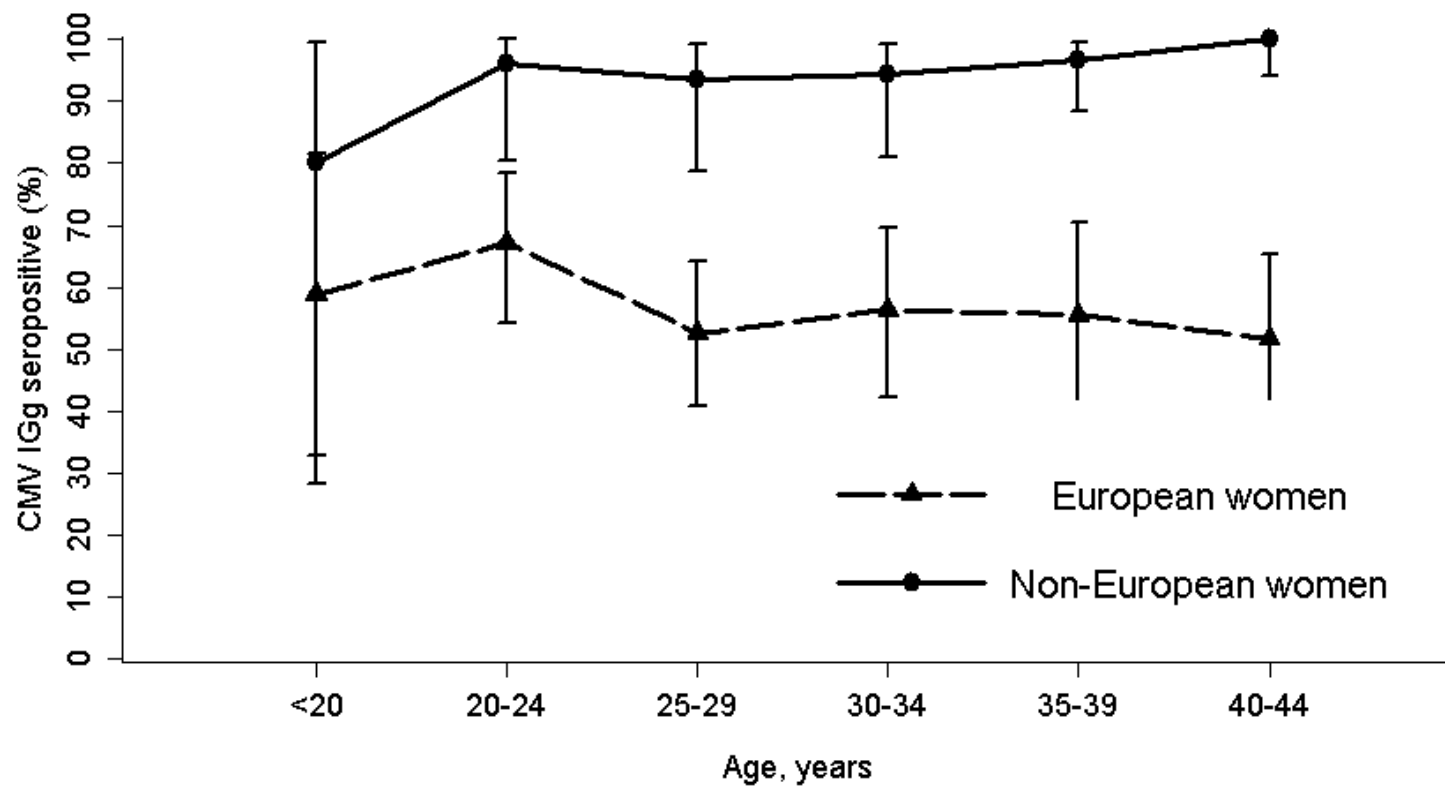

Figure 1. CMV seroprevalence by age stratified by continent of birth

Supplement: MOESM1 [file 9491842]
